# Supplementary material for: Genome-Resolved Metagenomics of Nitrogen Transformations in the Switchgrass Rhizosphere Microbiome on Marginal Lands
Source: MDPI journal article supplement (doi:10.3390/agronomy13051294), 2023-05-03

# GLBRC Marginal Land Experiment (MLE): Michigan South - Lux Arbor

Lux Arbor Reserve  
 Kellogg Biological Station  
 Hickory Corners, MI  
 42.4764, -85.4519

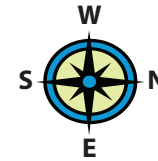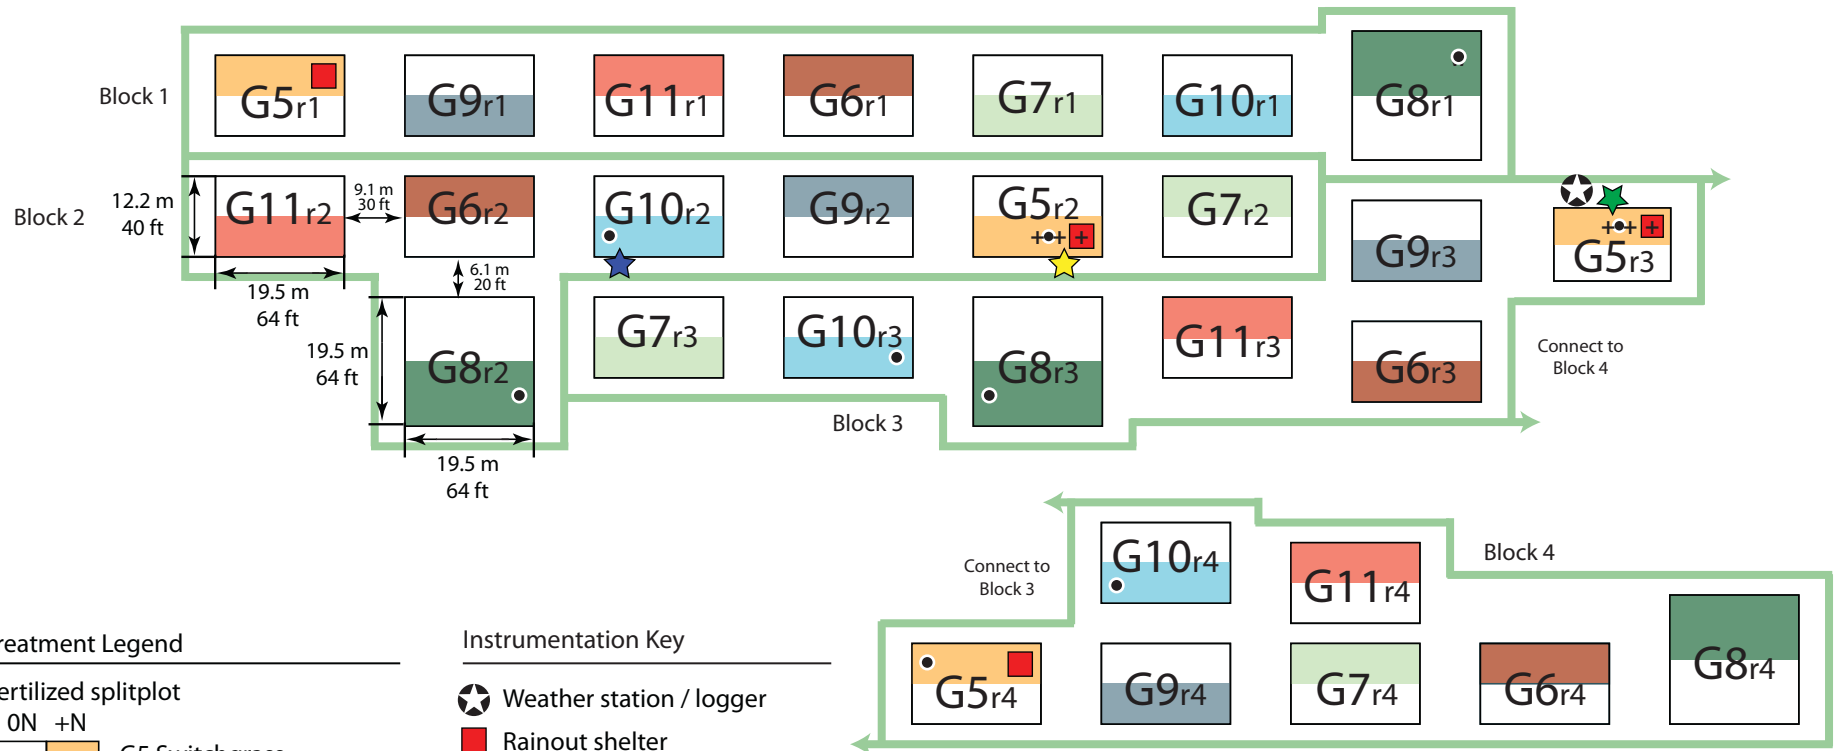

### Treatment Legend

Fertilized splitplot  
 0N +N

- G5 Switchgrass
- G6 Miscanthus
- G7 Native Grasses
- G8 Hybrid Poplar
- G9 Early Successional
- G10 Restored Prairie
- G11 Historical Vegetation

### Instrumentation Key

- Weather station / logger
- Rainout shelter
- Data logger 1
- Data logger 2
- Data logger 3
- Water profiler
- Soil moisture/temperature probes 10, 25 cm

### Location

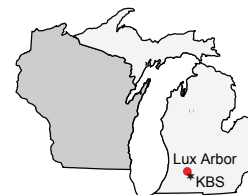

### Block Arrangement

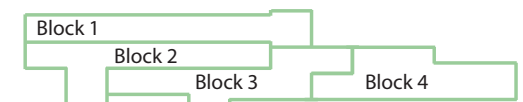

Supplement: s1 [file s1]
